# Supplementary material for: Inhibition of hypothalamic leukemia inhibitory factor exacerbates diet-induced obesity phenotype
Source: Springer Nature journal article supplement (doi:10.1186/s12974-017-0956-9), 2017-09-02
Supplement: MOESM1 [file 14970946]

## Inhibition of hypothalamic leukemia inhibitory factor exacerbates diet-induced obesity phenotype

Milena Fioravante<sup>1</sup>, Bruna Bombassaro<sup>1</sup>, Albina F. Ramalho<sup>1</sup>, Nathalia R. Dragano<sup>1</sup>, Joseane Morari<sup>1</sup>, Carina Solon<sup>1</sup>, Natalia Tobar<sup>2</sup>, Celso D. Ramos<sup>2</sup>, Licio A. Velloso<sup>1</sup>

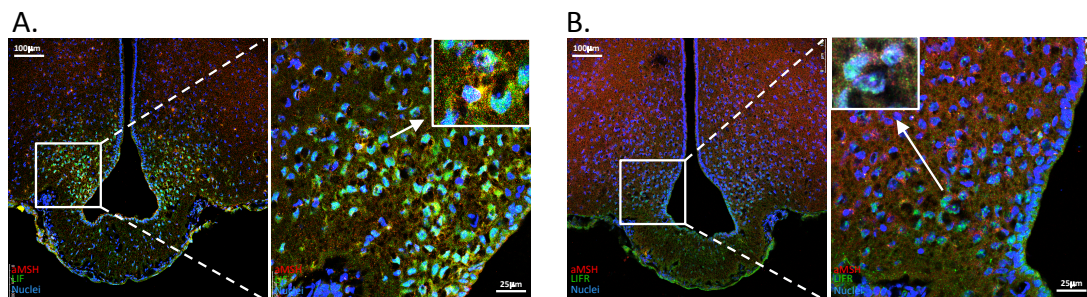

**Figure S1** . The anatomical and cellular distribution of LIF and LIF receptor in the hypothalamus of mice. Hypothalamic 5.0µm frozen sections were prepared from 5-week old mice fed on chow. Immunofluorescence staining was performed using antibodies against LIF (A), LIF receptor (LIFR) (B), alpha-MSH (αMSH) (A, B). The high magnification images depict details of cells (arrows). Nuclei was labeled using DAPI. Color code and magnifications are presented in the panels. Figures are representative of three independent experiments.

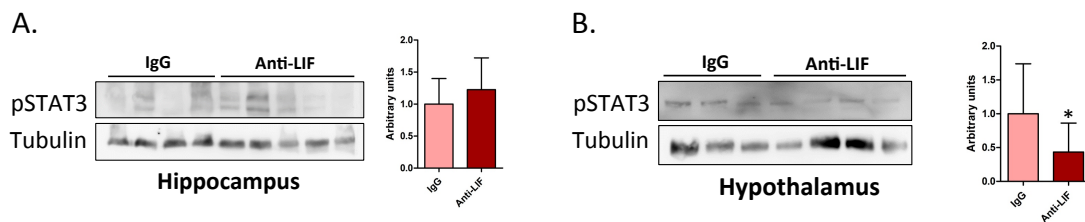

**Figure S2** . The impact of LIF immunoneutralization on STAT3 phosphorylation in the hippocampus and hypothalamus. The expression of phosphor-STAT3 (pSTAT3) protein was evaluated by immunoblot in the hippocampus (A) and hypothalamus (B) of obesity-resistant mice treated with non-immune IgG or anti-LIF antibody for 15 days. N=3-4; \*p<0.05 vs. IgG.

**Table S1.** *Composition of the diets*

| <b>Ingredients</b>      | <b>Chow - Control (g)</b> | <b>High Fat Diet (g)</b> |
|-------------------------|---------------------------|--------------------------|
| Starch                  | 427,5                     | 115,5                    |
| Protein (Casein)        | 200                       | 200                      |
| Dextrinized Corn Starch | 132                       | 132                      |
| Sucrose                 | 100                       | 100                      |
| Soybean Oil             | 40                        | 40                       |
| Lard                    | 0                         | 312                      |
| L-Cystine               | 3                         | 3                        |
| Choline                 | 2,5                       | 2,5                      |
| Cellulose (Fiber)       | 50                        | 50                       |
| Minerals Mix            | 35                        | 35                       |
| Vitamins Mix            | 10                        | 10                       |
| <b>Total</b>            | <b>1000</b>               | <b>1000</b>              |

**Table S2.** *Transcripts evaluated with the real-time PR array*

| <b>Uni Gene</b> | <b>Ref Seq</b> | <b>Symbol</b> | <b>Description</b>                      |
|-----------------|----------------|---------------|-----------------------------------------|
| Mm.29368        | NM_011784      | Aplnr         | Apelin receptor                         |
| Mm.1442         | NM_007540      | Bdnf          | Brain derived neurotrophic factor       |
| Mm.6246         | NM_007551      | Cxcr5         | Chemokine (C-X-C motif) receptor 5      |
| Mm.483321       | NM_009756      | Bmp10         | Bone morphogenetic protein 10           |
| Mm.42160        | NM_009757      | Bmp15         | Bone morphogenetic protein 15           |
| Mm.385759       | NM_007556      | Bmp6          | Bone morphogenetic protein 6            |
| Mm.258105       | NM_021609      | Ccbp2         | Chemokine binding protein 2             |
| Mm.1283         | NM_011329      | Ccl1          | Chemokine (C-C motif) ligand 1          |
| Mm.4686         | NM_011330      | Ccl11         | Chemokine (C-C motif) ligand 11         |
| Mm.867          | NM_011331      | Ccl12         | Chemokine (C-C motif) ligand 12         |
| Mm.41988        | NM_011332      | Ccl17         | Chemokine (C-C motif) ligand 17         |
| Mm.424740       | NM_011888      | Ccl19         | Chemokine (C-C motif) ligand 19         |
| Mm.290320       | NM_011333      | Ccl2          | Chemokine (C-C motif) ligand 2          |
| Mm.116739       | NM_016960      | Ccl20         | Chemokine (C-C motif) ligand 20         |
| Mm.244263       | NM_013652      | Ccl4          | Chemokine (C-C motif) ligand 4          |
| Mm.284248       | NM_013653      | Ccl5          | Chemokine (C-C motif) ligand 5          |
| Mm.137          | NM_009139      | Ccl6          | Chemokine (C-C motif) ligand 6          |
| Mm.341574       | NM_013654      | Ccl7          | Chemokine (C-C motif) ligand 7          |
| Mm.42029        | NM_021443      | Ccl8          | Chemokine (C-C motif) ligand 8          |
| Mm.416125       | NM_011338      | Ccl9          | Chemokine (C-C motif) ligand 9          |
| Mm.274927       | NM_009912      | Ccr1          | Chemokine (C-C motif) receptor 1        |
| Mm.423532       | NM_007718      | Ccr11         | Chemokine (C-C motif) receptor 1-like 1 |
| Mm.6272         | NM_009915      | Ccr2          | Chemokine (C-C motif) receptor 2        |

|           |           |        |                                                      |
|-----------|-----------|--------|------------------------------------------------------|
| Mm.57050  | NM_009914 | Ccr3   | Chemokine (C-C motif) receptor 3                     |
| Mm.1337   | NM_009916 | Ccr4   | Chemokine (C-C motif) receptor 4                     |
| Mm.14302  | NM_009917 | Ccr5   | Chemokine (C-C motif) receptor 5                     |
| Mm.8007   | NM_009835 | Ccr6   | Chemokine (C-C motif) receptor 6                     |
| Mm.2932   | NM_007719 | Ccr7   | Chemokine (C-C motif) receptor 7                     |
| Mm.442098 | NM_007720 | Ccr8   | Chemokine (C-C motif) receptor 8                     |
| Mm.440604 | NM_009913 | Ccr9   | Chemokine (C-C motif) receptor 9                     |
| Mm.269254 | NM_145700 | Ccr11  | Chemokine (C-C motif) receptor-like 1                |
| Mm.7336   | NM_017466 | Ccr12  | Chemokine (C-C motif) receptor-like 2                |
| Mm.272746 | NM_027022 | Cmtm2a | CKLF-like MARVEL transmembrane domain containing 2A  |
| Mm.390108 | NM_024217 | Cmtm3  | CKLF-like MARVEL transmembrane domain containing 3   |
| Mm.383258 | NM_153582 | Cmtm4  | CKLF-like MARVEL transmembrane domain containing 4   |
| Mm.41614  | NM_026066 | Cmtm5  | CKLF-like MARVEL transmembrane domain containing 5   |
| Mm.28858  | NM_026036 | Cmtm6  | CKLF-like MARVEL transmembrane domain containing 6   |
| Mm.5196   | NM_008153 | Cmklr1 | Chemokine-like receptor 1                            |
| Mm.6522   | NM_007722 | Cxcr7  | Chemokine (C-X-C motif) receptor 7                   |
| Mm.795    | NM_007778 | Csf1   | Colony stimulating factor 1 (macrophage)             |
| Mm.4922   | NM_009969 | Csf2   | Colony stimulating factor 2 (granulocyte-macrophage) |
| Mm.103711 | NM_009142 | Cx3cl1 | Chemokine (C-X3-C motif) ligand 1                    |
| Mm.44065  | NM_009987 | Cx3cr1 | Chemokine (C-X3-C) receptor 1                        |
| Mm.21013  | NM_008176 | Cxcl1  | Chemokine (C-X-C motif) ligand 1                     |
| Mm.877    | NM_021274 | Cxcl10 | Chemokine (C-X-C motif) ligand 10                    |
| Mm.131723 | NM_019494 | Cxcl11 | Chemokine (C-X-C motif) ligand 11                    |
| Mm.303231 | NM_021704 | Cxcl12 | Chemokine (C-X-C motif) ligand 12                    |
| Mm.10116  | NM_018866 | Cxcl13 | Chemokine (C-X-C motif) ligand 13                    |
| Mm.64326  | NM_011339 | Cxcl15 | Chemokine (C-X-C motif) ligand 15                    |
| Mm.4979   | NM_009140 | Cxcl2  | Chemokine (C-X-C motif) ligand 2                     |
| Mm.332490 | NM_019932 | Pf4    | Platelet factor 4                                    |
| Mm.4660   | NM_009141 | Cxcl5  | Chemokine (C-X-C motif) ligand 5                     |
| Mm.293614 | NM_023785 | Ppbp   | Pro-platelet basic protein                           |
| Mm.766    | NM_008599 | Cxcl9  | Chemokine (C-X-C motif) ligand 9                     |
| Mm.12876  | NM_009910 | Cxcr3  | Chemokine (C-X-C motif) receptor 3                   |
| Mm.1401   | NM_009911 | Cxcr4  | Chemokine (C-X-C motif) receptor 4                   |
| Mm.124289 | NM_030712 | Cxcr6  | Chemokine (C-X-C motif) receptor 6                   |
| Mm.287977 | NM_138302 | Tymp   | Thymidine phosphorylase                              |
| Mm.4744   | NM_008109 | Gdf5   | Growth differentiation factor 5                      |
| Mm.8021   | NM_007721 | Ccr10  | Chemokine (C-C motif) receptor 10                    |
| Mm.33362  | NM_175520 | Gpr81  | G protein-coupled receptor 81                        |
| Mm.3879   | NM_010431 | Hif1a  | Hypoxia inducible factor 1, alpha subunit            |
| Mm.1284   | NM_008355 | Il13   | Interleukin 13                                       |
| Mm.10137  | NM_010551 | Il16   | Interleukin 16                                       |
| Mm.1410   | NM_008360 | Il18   | Interleukin 18                                       |
| Mm.15534  | NM_010554 | Il1a   | Interleukin 1 alpha                                  |
| Mm.276360 | NM_021283 | Il4    | Interleukin 4                                        |
| Mm.337035 | NM_178241 | Cxcr1  | Chemokine (C-X-C motif) receptor 1                   |
| Mm.234466 | NM_009909 | Cxcr2  | Chemokine (C-X-C motif) receptor 2                   |
| Mm.1100   | NM_010564 | Inha   | Inhibin alpha                                        |
| Mm.3092   | NM_008381 | Inhbb  | Inhibin beta-B                                       |
| Mm.4964   | NM_008501 | Lif    | Leukemia inhibitory factor                           |

|           |           |          |                                                                      |
|-----------|-----------|----------|----------------------------------------------------------------------|
| Mm.159670 | NM_020490 | Ltb4r2   | Leukotriene B4 receptor 2                                            |
| Mm.29564  | NM_008610 | Mmp2     | Matrix metalloproteinase 2                                           |
| Mm.213003 | NM_010851 | Myd88    | Myeloid differentiation primary response gene 88                     |
| Mm.256765 | NM_008689 | Nfkb1    | Nuclear factor of kappa light polypeptide gene enhancer in B-cells 1 |
| Mm.286753 | NM_019492 | Rgs3     | Regulator of G-protein signaling 3                                   |
| Mm.289739 | NM_178804 | Slit2    | Slit homolog 2 (Drosophila)                                          |
| Mm.38049  | NM_021297 | Tlr4     | Toll-like receptor 4                                                 |
| Mm.1293   | NM_013693 | Tnf      | Tumor necrosis factor                                                |
| Mm.1258   | NM_011609 | Tnfrsf1a | Tumor necrosis factor receptor superfamily, member 1a                |
| Mm.483369 | NM_019418 | Tnfsf14  | Tumor necrosis factor (ligand) superfamily, member 14                |
| Mm.248352 | NM_021406 | Trem1    | Triggering receptor expressed on myeloid cells 1                     |
| Mm.190    | NM_008510 | Xcl1     | Chemokine (C motif) ligand 1                                         |
| Mm.3317   | NM_010368 | Gusb     | Glucuronidase, beta                                                  |
| Mm.299381 | NM_013556 | Hprt     | Hypoxanthine guanine phosphoribosyl transferase                      |
| Mm.2180   | NM_008302 | Hsp90ab1 | Heat shock protein 90 alpha (cytosolic), class B member 1            |
| Mm.343110 | NM_008084 | Gapdh    | Glyceraldehyde-3-phosphate dehydrogenase                             |
| Mm.328431 | NM_007393 | Actb     | Actin, beta                                                          |
